# Supplementary material for: Clinical Implication of PD-L1 Expression in Patients with Endometrial Cancer
Source: MDPI journal article supplement (doi:10.3390/biomedicines11102691), 2023-10-01
Supplement: s1 [file s1]

Table S1. Univariate analysis of PFS

| Parameters                              | aHR   | 95% CI       | p-value |
|-----------------------------------------|-------|--------------|---------|
| PD-L1                                   | 0.528 | 0.227–1.230  | 0.139   |
| <b>Invasion &gt; 1/2</b>                | 6.927 | 3.125–15.354 | <0.001  |
| <b>Grade 3</b>                          | 6.143 | 2.882–13.093 | <0.001  |
| <b>Stage II and above</b>               | 7.385 | 3.529–15.456 | <0.001  |
| <b>Lymph node metastasis</b>            | 6.394 | 2.870–14.244 | <0.001  |
| <b>Other histology</b>                  | 4.207 | 2.034–8.700  | <0.001  |
| <b>Serum CA125 <math>\geq</math> 35</b> | 3.973 | 1.936–8.154  | <0.001  |
| MSI-H                                   | 0.641 | 0.263–1.563  | 0.328   |
| <b>p53 mutant type</b>                  | 4.969 | 2.020–12.226 | <0.001  |

Abbreviations: aHR, adjusted hazard ratio; CI, confidence interval

Table S2. Multivariate analysis of PFS

| Parameters                | aHR   | 95% CI       | p-value |
|---------------------------|-------|--------------|---------|
| PD-L1                     | 0.404 | 0.140–1.164  | 0.093   |
| <b>Invasion &gt; 1/2</b>  | 4.419 | 1.596–12.237 | 0.004   |
| <b>Grade 3</b>            | 3.645 | 1.253–10.601 | 0.018   |
| <b>Stage II and above</b> | 4.990 | 1.741–14.303 | 0.003   |
| Lymph node metastasis     | 0.482 | 0.106–2.195  | 0.346   |
| Other histology           | 1.611 | 0.367–7.078  | 0.528   |
| Serum CA125 $\geq$ 35     | 0.382 | 0.083–1.753  | 0.216   |
| MSI-H                     | 0.426 | 0.119–1.525  | 0.190   |
| P53 mutant type           | 0.641 | 0.146–2.817  | 0.556   |

Abbreviations: aHR, adjusted hazard ratio; CI, confidence interval

Table S3. Subgroup analysis for adjuvant treatment group: progression-free survival (univariate analysis)

| Parameters             | Univariate   |                    |              | Multivariate |         |
|------------------------|--------------|--------------------|--------------|--------------|---------|
|                        | aHR          | 95% CI             | p-Value      | aHR          | p-value |
| PD-L1                  | 0.442        | 0.186–1.053        | 0.065        |              |         |
| Invasion > 1/2         | 0.903        | 0.385–2.119        | 0.814        |              |         |
| Grade 3                | 0.951        | 0.404–2.241        | 0.909        |              |         |
| Stage II and above     | 0.879        | 0.357–2.164        | 0.778        |              |         |
| Tumor size over 2 cm   | 0.698        | 0.316–1.542        | 0.374        |              |         |
| Lymph node meta        | 0.530        | 0.235–1.195        | 0.126        |              |         |
| Other histology        | 1.318        | 0.583–2.978        | 0.508        |              |         |
| Serum CA125 $\geq$ 25  | 0.945        | 0.439–2.036        | 0.885        |              |         |
| <b>MSI-H</b>           | <b>0.188</b> | <b>0.040–0.886</b> | <b>0.035</b> | 0.226        | 0.303.  |
| <b>P53 mutant type</b> | <b>2.684</b> | <b>1.034–6.973</b> | <b>0.043</b> | 0.000        | 0.995   |

Abbreviations: aHR, adjusted hazard ratio; CI, confidence interval
